1        **The evolution of fluoroquinolone resistance in *Salmonella***  
2                    **under exposure to sub-inhibitory concentration of**  
3                                    **enrofloxacin**

4  
5        Yufeng Gu<sup>a,b</sup>, Lulu Huang<sup>a,b</sup>, Cuirong Wu<sup>a,b</sup>, Junhong Huang<sup>a,b</sup>, Haihong Hao<sup>a,b</sup>,  
6                                    Zonghui Yuan<sup>a,b</sup>, Guyue Cheng<sup>a,b,\*</sup>

7  
8        <sup>a</sup> College of Veterinary Medicine, Huazhong Agricultural University, Wuhan 430070,  
9        P. R. China

10        <sup>b</sup> MOA Laboratory for Risk Assessment of Quality and Safety of Livestock and  
11        Poultry Products, Huazhong Agricultural University, Wuhan 430070, P. R. China

12  
13        \*Corresponding author: Dr. Guyue Cheng, E-mail: [chengguyue@mail.hzau.edu.cn](mailto:chengguyue@mail.hzau.edu.cn)

14

15           **Abstract:** The evolution of resistance in *Salmonella* to fluoroquinolones  
16 (FQs) under a broad range of sub-inhibitory concentrations (sub-MICs) has not been  
17 systematically studied. This study investigated the mechanism of resistance  
18 development in *Salmonella enterica* serovar Enteritidis (*S. Enteritidis*) under  
19 sub-MICs of  $1/128 \times \text{MIC}$  to  $1/2 \times \text{MIC}$  of enrofloxacin (ENR), a widely used  
20 veterinary FQ. It was shown that the resistance rate and resistance level of *S.*  
21 *Enteritidis* varied with the increase of ENR concentration and duration of selection.  
22 qRT-PCR results demonstrated that the expression of outer membrane porin (OMP)  
23 genes, *ompF*, *ompC* and *ompD*, were down-regulated first to rapidly adapt and  
24 develop resistance of  $\leq 4 \times \text{MIC}$ , and as the resistance level increased ( $\geq 8 \times \text{MIC}$ ),  
25 the up-regulated expression of efflux pump genes, *acrB*, *emrB* and *mdfA*, along with  
26 mutations in quinolone resistance-determining region (QRDR) gradually played a  
27 decisive role. Cytohubba analysis based on transcriptomic profiles demonstrated that  
28 *purB*, *purC*, *purD*, *purF*, *purH*, *purK*, *purL*, *purM*, *purN* and *purT* were the hub genes  
29 for the FQs resistance. 'de novo' IMP biosynthetic process, purine ribonucleoside  
30 monophosphate biosynthetic process and purine ribonucleotide biosynthetic process  
31 were the top three biological processes screened by MCODE. This study first  
32 described the dynamics of FQ resistance evolution in *Salmonella* under a long-term  
33 selection of sub-MICs of ENR *in vitro*. In addition, this work offers greater insight  
34 into the transcriptome changes of *S. Enteritidis* under the selection of ENR and  
35 provides a framework for FQs resistance of *Salmonella* for further studies.

36

37           **Key words:** *Salmonella*, enrofloxacin, resistance, sub-inhibitory concentration,  
38 transcriptome sequencing

39

## 40 **1 Introduction**

41 *Salmonella enterica* serovar Enteritidis (*S. Enteritidis*), a zoonotic foodborne  
42 pathogen, has been widely recognized as one of the most common causes of  
43 gastroenteritis in humans<sup>[1]</sup>. According to the report of World Health Organization, *S.*  
44 Typhimurium and *S. Enteritidis* are the most frequently isolated *Salmonella* serotypes  
45 from countries involved in the Global Foodborne Infections Network<sup>[2]</sup>.  
46 Fluoroquinolones (FQs) have been broadly applied in clinical practice for treating  
47 salmonellosis in both humans and animals<sup>[3, 4]</sup>. The emergence of resistance to FQs  
48 has become a critical problem in clinical treatment of salmonellosis<sup>[5]</sup>.

49 The mechanisms of FQs resistance in *Salmonella* include point mutations in  
50 quinolone resistant determining regions (QRDRs) in *gyrA*, *gyrB*, *parC* and *parE*<sup>[6]</sup>.  
51 Besides, decreased intake as well as increased efflux of FQs adds to the resistant  
52 phenotype of *Salmonella*. For example, changes in outer membrane porins (OMPs)  
53 (e.g. OmpC, OmpD and OmpF)<sup>[7]</sup> and elevated expression of multidrug resistance  
54 (MDR) efflux pumps (e.g. AcrAB, AcrEF, EmrAB, MdfA and MdtK)<sup>[8]</sup> of  
55 *Salmonella* has been demonstrated as resistance mechanism to FQs for both clinical  
56 resistant isolates and resistant clones *de novo* selected by increasing concentrations  
57 (above MIC) of FQs *in vitro*<sup>[9]</sup>. However, the time sequence of the emergence of these  
58 various resistance mechanisms and the correlation with the level of resistance and the  
59 pressure of different antibiotic concentration is unclear and remains to be studied in  
60 detail.

61 Antimicrobials at sub-inhibitory concentrations (sub-MICs) are commonly found  
62 in patients, livestock and the environment, often at a wide concentration ranging  
63 from 1/4 to 1/230 of the MIC<sup>[10, 11]</sup>. However, previous understanding of the resistance  
64 evolution process is mostly based on mutants selected by incrementally increasing  
65 antibiotic concentrations within mutant selection windows (MSW)<sup>[12, 13]</sup>. It has been  
66 shown that *de novo* mutants can be selected at sub-MIC of antimicrobials associated  
67 with several secondary effects, such as inducing the SOS response, stimulating the

68 production of reactive oxygen species, increasing the frequency of errors in protein  
69 synthesis, increasing the rates of recombination and horizontal gene transfer, etc<sup>[14-18]</sup>.

70 Recent work has shown that the resistance mechanisms induced by sub-MIC  
71 exposure may be different compared to selection with antibiotics concentration above  
72 MIC. In *S. Enteritidis*, high-level resistance was selected by sub-MICs of  
73 streptomycin through multiple small-effect resistance mutations, whereas specific  
74 target mutations were generated under selection with antibiotics concentration above  
75 MIC<sup>[19]</sup>. While many studies have investigated the resistance mechanism of bacteria  
76 under a short-term exposure to antibiotics <sup>[20, 21]</sup>, less is known about the effects of  
77 long-term exposure to sub-MIC of antibiotics. When exploring the *de novo* high-level  
78 or clinical resistance to the antimicrobial agent, most of these reports are endpoint  
79 observations and seldom take into account the changes occurring during the resistance  
80 evolution process. A more comprehensive understanding of the resistance  
81 development trajectory could help overcome resistance emergence.

82 Here, we systematically explored the resistance evolution of *S. Enteritidis* during  
83 a long-term exposure to a wide range of sub-MICs (1/128×MIC to 1/2×MIC) of  
84 enrofloxacin (ENR) and compared the effect of several concentration of ENR on the  
85 origin of resistance, focusing on the resistance mechanism to ENR. The known  
86 resistance mechanisms associated with *de novo* antibiotic resistance were analyzed in  
87 this study, including QRDRs of *gyrA*, *gyrB*, *parC* and *parE* genes, expression levels  
88 of the OMPs and MDR efflux pump genes. Transcriptome profiles of *S. Enteritidis*  
89 mutants with MIC level of 32×MIC, 16×MIC and 8×MIC were compared to *S.*  
90 *Enteritidis* parental strain, giving an indication of the resistance evolution route and  
91 molecular mechanism of *S. Enteritidis* under exposure to ENR in a long-term.  
92 Therefore, the purpose of this study was to determine the role of different resistance  
93 mechanism under selection of sub-MICs of ENR during the resistance development  
94 term. Overall, our findings added to evidence that sub-MIC antibiotic exposure and  
95 long-term selection prime bacteria for reduced susceptibility and resistance evolution.

96

## 97 **2 Materials and methods**

### 98 **2.1 Bacteria, drugs, and reagents**

99 *S. Enteritidis* CICC21527 was purchased from (China Center of Industrial  
100 Culture Collection, CICC, China). ENR (purity of 94.2%) was bought from China  
101 Institute of Pharmaceutical and Biological Products Inspection (Beijing, China).  
102 Luria-Bertani broth (LB) and Tryptone soybean agar (TSA) was purchased from  
103 HOPEBIO (Tsingtao, China). Premix Taq was bought from Moralsbio (Wuhan,  
104 China), and Ex Taq™ DNA Polymerase and SYBR was bought from Vazyme Biotech  
105 (Nanjing, China). HiFiScript gDNA Removal RT MasterMix was from Cwbio  
106 (Beijing, China), and RNAprep pure Bacteria kit was from Majorbio (Shanghai,  
107 China). gDNA Removal RT MasterMix was bought from Cwbio (Beijing, China).

### 108 **2.2 Antimicrobial susceptibility testing**

109 The MICs of ENR for wild-type and mutants of *S. Enteritidis* CICC21527 were  
110 determined using the broth micro-dilution method, according to the guidelines of the  
111 Clinical and Laboratory Standards Institute (CLSI)<sup>[22]</sup>.

### 112 **2.3 *In vitro* selection of mutants under sub-MICs of ENR**

113 To select *de novo* generated mutants, *S. Enteritidis* CICC21527 was cultured and  
114 passaged respectively in LB medium containing ENR at concentrations lower than  
115 MIC values, including 0.031 µg/mL (1/2×MIC), 0.016 µg/mL (1/4×MIC), 0.008  
116 µg/mL (1/8×MIC), 0.004 µg/mL (1/16×MIC), 0.002 µg/mL (1/32×MIC), 0.001 µg/mL  
117 (1/64×MIC) and 0.0005 µg/mL (1/128×MIC). The culturing, passaging and mutant  
118 screening methods were carried as previously described<sup>[23,24]</sup>. The MICs of the  
119 selected mutants were confirmed by antimicrobial susceptibility testing. The 2×MIC  
120 mutants selected by 1/2×MIC, 1/4×MIC, 1/8×MIC, 1/16×MIC, 1/32×MIC, 1/64×MIC  
121 and 1/128×MIC of ENR were named 2M (1/2M), 2M (1/4M), 2M (1/8M), 2M  
122 (1/16M), 2M (1/32M), 2M (1/64M) and 2M (1/128M), respectively. The 4×MIC to  
123 32×MIC mutants induced by sub-MICs of ENR were also similarly named. The  
124 mutants were grouped as reduced susceptibility (MIC=0.125-0.5 µg/mL) and

125 resistance (MIC $\geq$ 1  $\mu$ g/mL), according to CLSI guidelines<sup>[25]</sup>.

## 126 **2.4 Sequence analysis of QRDR region in *gyrA*, *gyrB*, *parC*, and *parE***

### 127 **genes**

128 Strains 2M (1/2M), 2M (1/8M), 2M (1/32M), 2M (1/128M), 4M (1/2M), 4M  
129 (1/8M), 4M (1/32M), 4M (1/128M), 8M (1/2M), 8M (1/8M), 8M (1/32M), 8M  
130 (1/128M), 16M (1/2M), 16M (1/8M), 16M (1/32M) and 32M (1/2M) were applied to  
131 the detection of the QRDR region in *gyrA*, *gyrB*, *parC*, and *parE*, according to Kim *et*  
132 *al*<sup>[26]</sup>. The PCR products were purified from agarose gels using a TIANgel  
133 Purification Kit (TianGen BioTech Co. Ltd, China), followed by nucleotide  
134 sequencing performed by Sangon Biotech (Shanghai) Co. Ltd, China. The sequencing  
135 results were compared with the genome sequence of *S. Enteritidis* CICC21527 (SRA  
136 Accession No. SRR14246558).

## 137 **2.5 Examination of the expression levels of OMPs and MDR efflux**

### 138 **pump transporters**

139 The strains as described in section 2.4 were subjected to gene expression analysis  
140 of *ompC*, *ompD*, *ompF*, *acrB*, *acrF*, *emrB*, *mdfA*, and *mdtK*. Total RNA was  
141 harvested from 1 mL aliquots of culture using RNAprep pure Bacteria kit according  
142 to the manufacturer's recommendation. DNA in total RNA was removed by treatment  
143 with HiFiScript gDNA Removal RT MasterMix and cDNA synthesis was performed  
144 using HiFiScript gDNA Removal cDNA Synthesis Kit according to the method  
145 described in the manufacturer. qRT-PCR amplification was conducted with an initial  
146 step of 5 min at 95°C, followed by 40 cycles of 10 s at 95°C, 30 s at the annealing  
147 temperature at 60°C. The *gapA* gene was used as an internal control for normalization,  
148 and the parental strains were used as references for their derived mutants. The 2<sup>- $\Delta\Delta$ CT</sup>  
149 method was used for relative gene expression calculations. Each RNA sample was  
150 tested in triplicate and the primers used are listed in **Tab. S1**.

## 151 **2.6 RNA sequencing and bioinformatic analysis**

152 The total RNA of parental *S. Enteritidis* CICC21527, reduced susceptibility

153 mutant 8M (1/128M), and resistant mutants 16M (1/8M) and 32M (1/2M) was  
154 processed as the reference described<sup>[24]</sup>. The samples were paired-end sequenced  
155 using an Illumina HiSeq™ 2000 system (Personalbio technology Co. Ltd, Nanjing,  
156 China). The reference genome for annotation was *S. Enteritidis* CICC21527 genome  
157 (SRA Accession No. SRR14246558). The sequencing data was submitted to the  
158 National Center for Biotechnology Information Sequence Read Archive (SRA) under  
159 Accession No. PRJNA700473.

160 To characterize the biological pathways associated with the co-DEGs of ENR  
161 resistance, co-DEGs were analysed in the ClueGO. The Retrieval of Interacting Genes  
162 database online tool (STRING; <http://stringdb.org/>) was used to analyse the PPI of  
163 DEGs, and those experimentally validated interactions with a combined score >0.4  
164 were selected as significant. The screened networks were visualized by Cytoscape  
165 3.8.0. The Cytohubba was used to check the hub genes and the MCODE was  
166 performed to establish PPI network modules, Degree cutoff = 2, Node score cutoff =  
167 0.2, k-core = 2, Max. Depth =100 as selected.

168

## 169 **3 Results**

### 170 **3.1 Resistance development of *S. Enteritidis* under exposure to** 171 **sub-MICs of ENR *in vitro***

172 The MIC of ENR for the parental *S. Enteritidis* CICC21527 strain was  
173 determined to be 0.0625 µg/mL. When exposed to sub-MICs of ENR, a gradual  
174 increase in the size of reduced susceptibility subpopulations was appeared during 600  
175 generations, while no decrease in susceptibility was observed in the absence of ENR  
176 (**Fig. 1**). With the increasing of ENR concentration, the mutants were enriched faster.  
177 Except 1/64×MIC and 1/128×MIC induction groups, all of the lineages had  
178 subpopulations with MIC value higher than 1 µg/mL (16×MIC) after 600 generations.  
179 32×MIC resistant subpopulations could only be selected by 1/2×MIC concentration of  
180 ENR at 600 generations. This showed an association between the concentrations of  
181 ENR and resistance occurrence rates as well as resistance levels of the mutant



182 subpopulation.

183

184

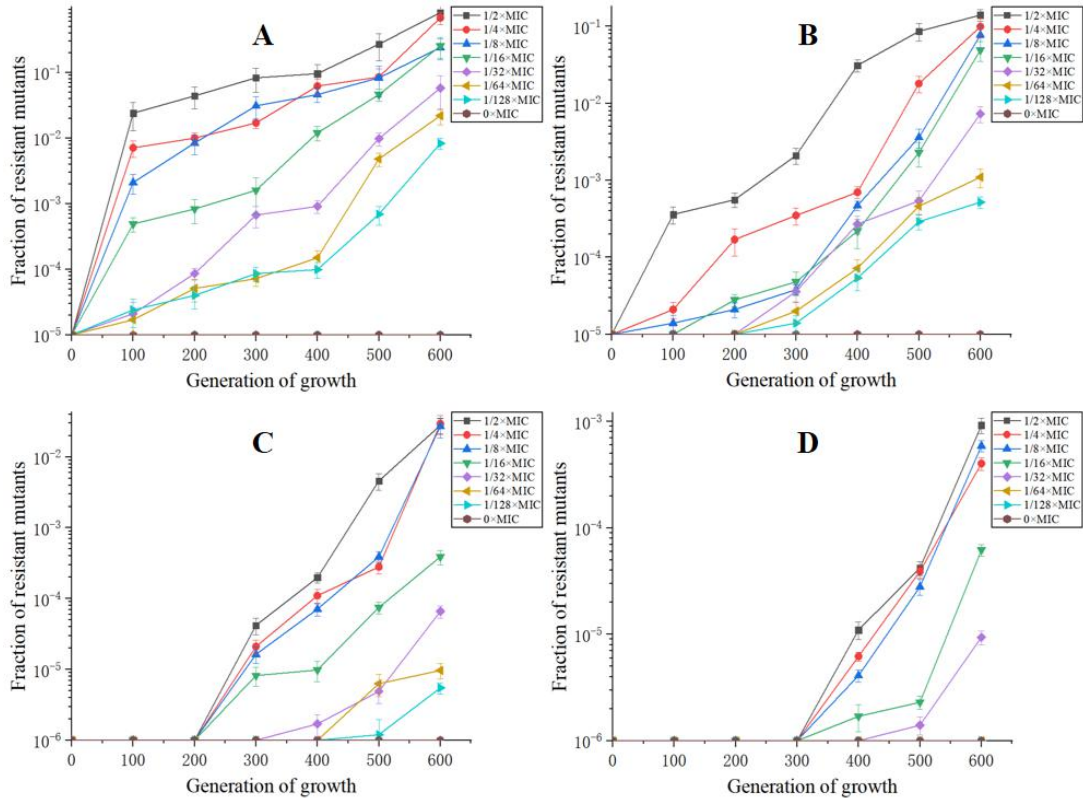

185

186 **Fig. 1. Resistance rates of *S. Enteritidis* CICC21527 exposed to sub-MICs of**  
187 **ENR at resistant level of 2×MIC (A), 4×MIC (B), 8×MIC (C) and 16×MIC (D).**

188

### 189 **3.2 Mutations in the QRDRs of the mutants with reduced** 190 **susceptibility to ENR**

191 Compared to the parental strain, 12 out of 16 strains exhibiting MICs of 2 to  
192 16×MIC had a mutation in the QRDR of the *gyrA* gene (**Tab. 1**). Among them, the  
193 mutation of Ser83Tyr was the most frequent (n=6), followed by the mutations of  
194 Ser83Phe (n=5) and Asp87Gly (n=2). It was also demonstrated that no mutation in  
195 *gyrA* were found in all reduced susceptibility mutants(≤8×MIC), while were found in  
196 all resistant mutants (≥16×MIC). No mutations in the QRDRs of *gyrB*, *parC* and  
197 *parE* were observed.

198



199 **Tab. 1. Mutation sites in the QRDRs of *gyrA*, *gyrB*, *parC*, and *parE* genes of *S. Enteritidis***  
 200 **mutants.**

| Strain NO. | MIC ( $\mu\text{g}/\text{mL}$ ) | Substitutions in QRDR amino acid residues |             |             |             |
|------------|---------------------------------|-------------------------------------------|-------------|-------------|-------------|
|            |                                 | <i>gyrA</i>                               | <i>gyrB</i> | <i>parC</i> | <i>parE</i> |
| 2M(1/2M)   | 0.125                           | wt                                        | wt          | wt          | wt          |
| 2M(1/8M)   | 0.125                           | Asp87Gly                                  | wt          | wt          | wt          |
| 2M(1/32M)  | 0.125                           | wt                                        | wt          | wt          | wt          |
| 2M(1/128M) | 0.125                           | Ser83Tyr                                  | wt          | wt          | wt          |
| 4M(1/2M)   | 0.25                            | wt                                        | wt          | wt          | wt          |
| 4M(1/8M)   | 0.25                            | Ser83Phe                                  | wt          | wt          | wt          |
| 4M(1/32M)  | 0.25                            | Ser83Tyr                                  | wt          | wt          | wt          |
| 4M(1/128M) | 0.25                            | Ser83Tyr                                  | wt          | wt          | wt          |
| 8M(1/2M)   | 0.5                             | wt                                        | wt          | wt          | wt          |
| 8M(1/8M)   | 0.5                             | Ser83Phe                                  | wt          | wt          | wt          |
| 8M(1/32M)  | 0.5                             | Ser83Phe                                  | wt          | wt          | wt          |
| 8M(1/128M) | 0.5                             | Asp87Gly                                  | wt          | wt          | wt          |
| 16M(1/2M)  | 1                               | Ser83Phe                                  | wt          | wt          | wt          |
| 16M(1/8M)  | 1                               | Ser83Phe                                  | wt          | wt          | wt          |
| 16M(1/32M) | 1                               | Ser83Tyr                                  | wt          | wt          | wt          |
| 32M(1/2M)  | 2                               | Ser83Tyr                                  | wt          | wt          | wt          |

201 Note: “wt” represented no mutation was observed.

202

### 203 **3.3 Expression of OMPs and MDR efflux pump transporters of the** 204 **mutants with reduced susceptibility to ENR**

205 The expression of the OMP genes, *ompC*, *ompD*, *ompF* and genes encoding  
 206 MDR efflux pump transporters, *acrB*, *acrF*, *emrB*, *mdfA*, *mdtK* of mutants was shown  
 207 in **Fig. 2**. In the mutants with susceptibility level less than  $8\times\text{MIC}$ , the expression of  
 208 *ompC*, *ompD* and *ompF* were down regulated, and the amount of down-regulation  
 209 decreased with the increase of resistance level. When the susceptibility level was  
 210 more than  $8\times\text{MIC}$ , the expression of *ompC* and *ompD* shifted to up-regulation, while  
 211 the expression of *ompF* remained down-regulated. The result showed that the  
 212 expression of *ompF* was well correlated with the selected concentration of ENR.

213 In general, *acrB*, *emrB* and *mdfA* were down regulated in the  $2\times\text{MIC}$  mutants.  
 214 When the susceptibility level was equal or greater than  $4\times\text{MIC}$ , these three genes  
 215 turned to up-regulated expression, and the expression level increased with the increase  
 216 of resistant level with *acrB* gene exhibiting a higher level of up-regulation compared

217 to those of the *emrB* and *mdfA* genes (**Fig. 2**). The expression of the other two MDR  
218 efflux pump transporter genes, *acrF* and *mdtK*, displayed a more strain dependent  
219 pattern in the reduced susceptible mutants, most of which showed up-regulation of  
220 *acrF* and *mdtK* genes in the 2×MIC mutants and down-regulation in mutants with  
221 resistant level  $\geq 4\times$ MIC, and as the resistant level increased, the expression of these  
222 two genes gradually decreased.

223

224

225

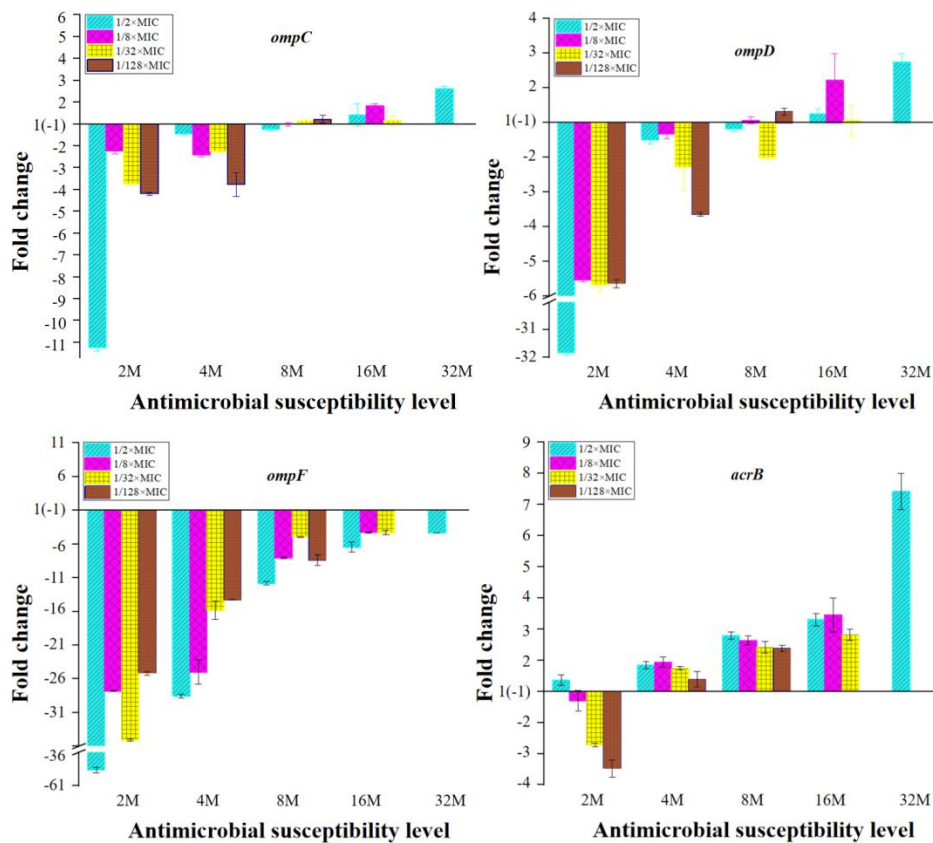

226

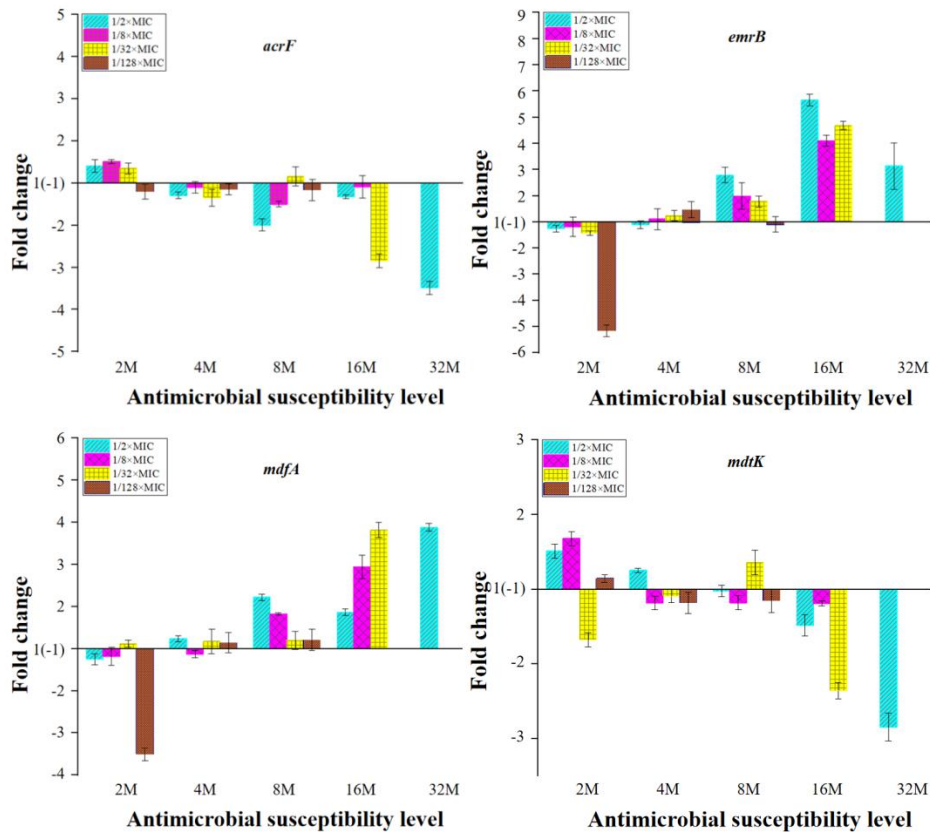

227

228 **Fig. 2. mRNA expression levels of the OMPs and MDR efflux pump transporter**  
 229 **genes in *Salmonella*.** Fold change =  $2^{-\Delta\Delta Ct}$ ,  $\Delta\Delta Ct = (CT_{target} - CT_{gapA})_{mutant} - (CT_{target}$   
 230  $- CT_{gapA})_{parental}$ . 2M, 4M, 8M, 16M represent 2×MIC mutants, 4×MIC mutants, 8×MIC mutants,  
 231 16×MIC mutants, respectively.

232

### 233 3.4 Transcriptomic profiles of *S. Enteritidis* mutants induced by 234 sub-MICs of ENR

235 Reduced susceptible mutant 8M (1/128M) (Group E), resistant mutant 16M  
 236 (1/32M) (Group D) and 32M (1/2M) (Group C), and parental strain (Group B) were  
 237 selected for analysis of transcriptomic profiles. The Pearson correlation coefficient in  
 238 each group was greater than 0.91, indicating that the correlation between triplicate  
 239 samples in the same group was good (Fig. S1). Compared to the parental strain, 2040  
 240 DEGs (1032 up-regulated and 1008 down-regulated) were found in the resistance  
 241 mutant 32M (1/2M), 1497 DEGs (723 up-regulated and 774 down-regulated) in  
 242 resistant mutant 16M (1/32M) and 1196 DEGs (644 up-regulated and 552

243 down-regulated) in reduced susceptibility mutant 8M (1/128M). Compared to the  
244 parental strain, there were 573 co-differentially expressed genes (co-DEGs) among  
245 the three mutants; 333 genes were up-regulated and 240 genes were down-regulated  
246 in mutant 32M (1/2M); 300 genes were up-regulated and 273 genes were  
247 down-regulated in mutant 16M (1/32M); 298 genes were up-regulated and 275 genes  
248 were down-regulated in mutant 8M (1/128M).

249 The 573 co-DEGs were enriched in 24 GO terms, including ribosome, purine  
250 nucleobase biosynthetic process, etc (**Fig. S2**). Ninety-six common KEGG Pathways  
251 were obtained, including ribosome, arginine and proline metabolism, nitrotoluene  
252 degradation, Lysine degradation, tryptophan metabolism, fructose and mannose  
253 metabolism, PTS system, etc (**Fig. S3**). Based on the information in the STRING  
254 protein query from public databases, 338 co-DEGs were mapped with the reference  
255 species of *S. enterica* CT18. Then 120 genes were obtained probably related to the  
256 mechanism of FQs resistance according to the annotation of Non-Redundant Protein  
257 Sequence Database. GO function (Kappa score  $\geq 0.8$ ) and KEGG pathway ( $P \leq 0.05$ )  
258 enrichment analyses of 120 candidate co-DEGs were performed with clueGO (**Fig. 3**).  
259 It was shown that these genes were classified into 14 functional categories including  
260 nucleoside metabolic, purine nucleobase biosynthetic process, nucleobase-containing  
261 compound biosynthetic process, hydroxymethyl-,formyl- and related transferase  
262 activity, tricarboxylic acid cycle, short-chain fatty acid metabolic,  
263 nucleobase-containing compound metabolic process, chromosome, DNA topological  
264 change, purine ribonucleoside triphosphate binding, organelle organization, RNA  
265 binding, RNA catabolic process, purine-containing compound biosynthetic process  
266 (**Fig. 3A**). The metabolic pathways were significantly enriched in one carbon pool by  
267 folate, purine metabolism, propanoate metabolism, citrate cycle (TCA cycle) and  
268 RNA degradation pathways (**Fig. 3B**).

269

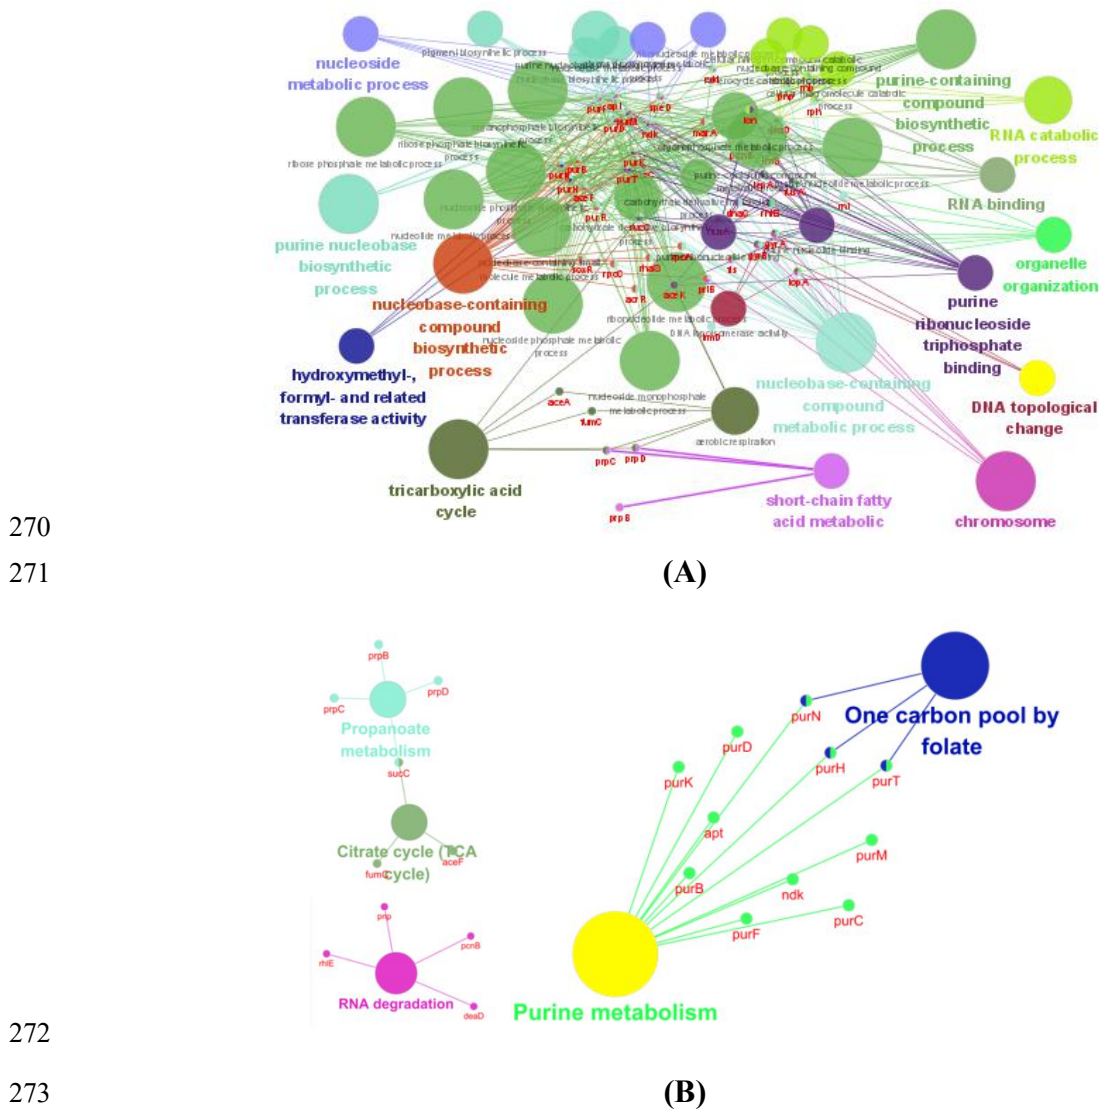

274 **Fig. 3. Enrichment analysis of GO and KEGG of genes that may be related**  
275 **to drug resistance by ClueGO. GO term enrichment (A); KEGG enrichment (B).**

276  
277 The 120 genes mentioned above encoding proteins belonging to the  
278 oxidoreductase, purine and pyrimidine metabolism, cell division, transcriptional  
279 regulator, stress response protein, DNA topoisomerase, DNA and RNA polymerase,  
280 RND efflux transporter were screened to identify molecular determinants associated  
281 with the response to ENR in *Salmonella*. With the aim of identifying key or central  
282 genes in the co-DEGs network of the *S. Enteritidis* mutants after exposure to  
283 sub-MICs of ENR, an analysis of hub gene identification was conducted based on  
284 STRING database (**Fig. 4A**).

285



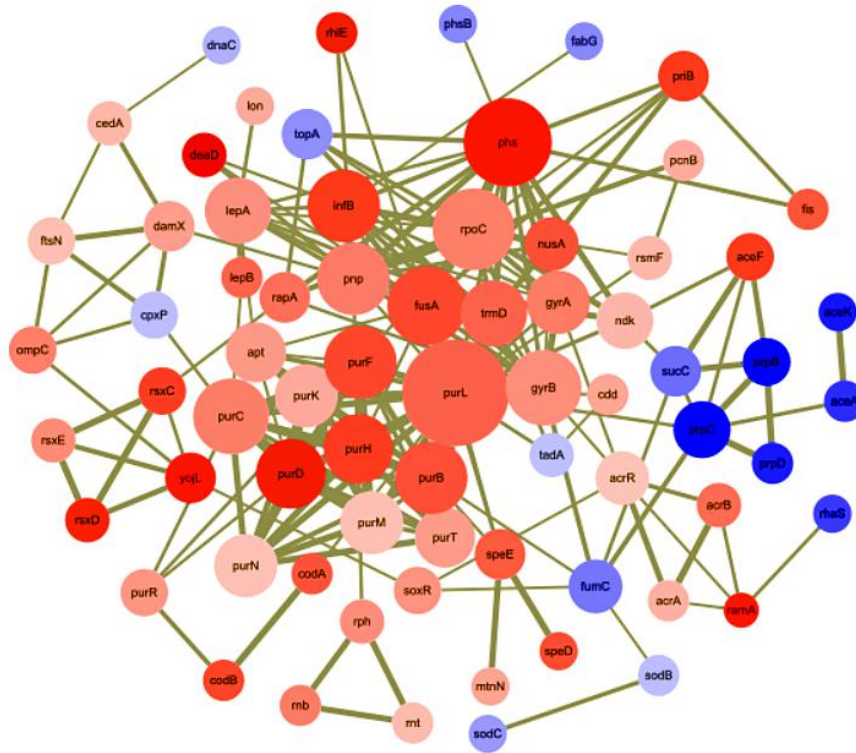

286

287

288

(A)

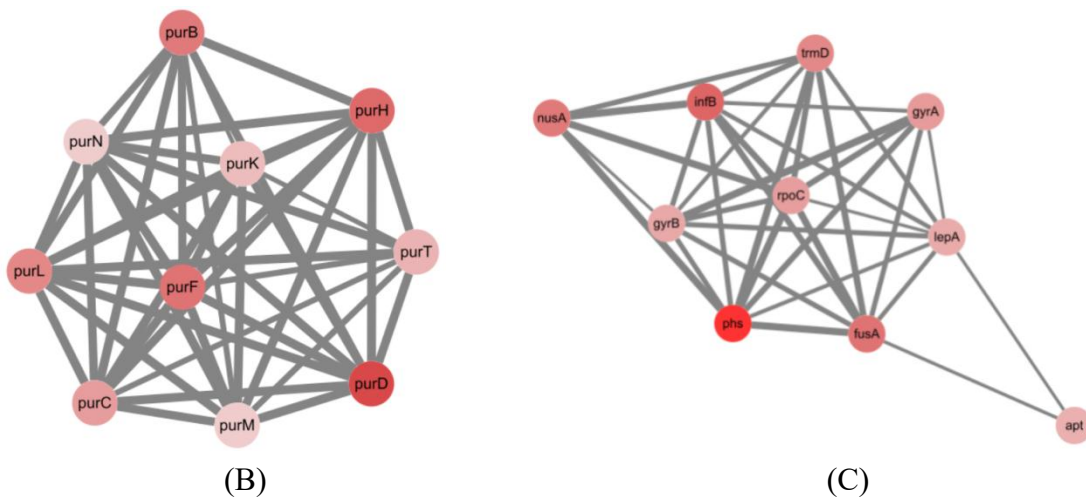

289

290

291

292

293

294

295

296

297

(B)

(C)

**Fig. 4. Network analysis of co-DEGs selected for underlying resistance mechanism.** (A) Using the STRING online database, total of 120 co-DEGs were filtered into the PPI network and visualized by Cytoscape; (B, C) Top two PPI networks in MCODE analysis.

Furthermore, the Cytohubba result showed that *purB*, *purC*, *purD*, *purF*, *purH*, *purK*, *purL*, *purM*, *purN* and *purT* were the hub genes that responded to sub-MICs of

298 ENR. To better understand the potential biological mechanism related to the network,  
 299 screened the top two clusters was screened by MCODE with the highest clustering  
 300 scores (Figure 4(B, C)) and the main biological processes (**Tab. 2**).

301 **Tab. 2. Enrichment analysis of the top 2 MCODE genes function.**

| MCODE           | GO         | Description                                              | False discovery rate  |
|-----------------|------------|----------------------------------------------------------|-----------------------|
| MCODE-1         | GO:0006189 | 'de novo' IMP biosynthetic process                       | $4.08 \times e^{-10}$ |
| MCODE-1/MCODE-2 | GO:0009168 | Purine ribonucleoside monophosphate biosynthetic process | $4.92 \times e^{-9}$  |
| MCODE-1/MCODE-2 | GO:0009152 | Purine ribonucleotide biosynthetic process               | $1.15 \times e^{-8}$  |
| MCODE-1/MCODE-2 | GO:0034641 | Cellular nitrogen compound metabolic process             | $1.55 \times e^{-8}$  |
| MCODE-1/MCODE-2 | GO:0044271 | Cellular nitrogen compound biosynthetic process          | $1.77 \times e^{-8}$  |

302

303 The 39 DEGs out of the 120 co-DEGs selected by the criteria of expression  
 304 fold-changes more than or equal to twice between these groups were selected for  
 305 candidated key genes for their differential expression between mutants 32M (1/2M),  
 306 16M (1/32M) and 8M (1/128M) (**Tab. S1**). These genes were further screened and the  
 307 heatmap was showed in **Fig. 5**, then STRING database was used to achieve the cluster  
 308 map. Totally, ten clusters were identified including purine biosynthesis, purine  
 309 biosynthesis, and pyrimidine metabolism, 'de novo' IMP biosynthetic process,  
 310 response to antibiotic and transcription regulator, DNA topoisomerase, etc.

311



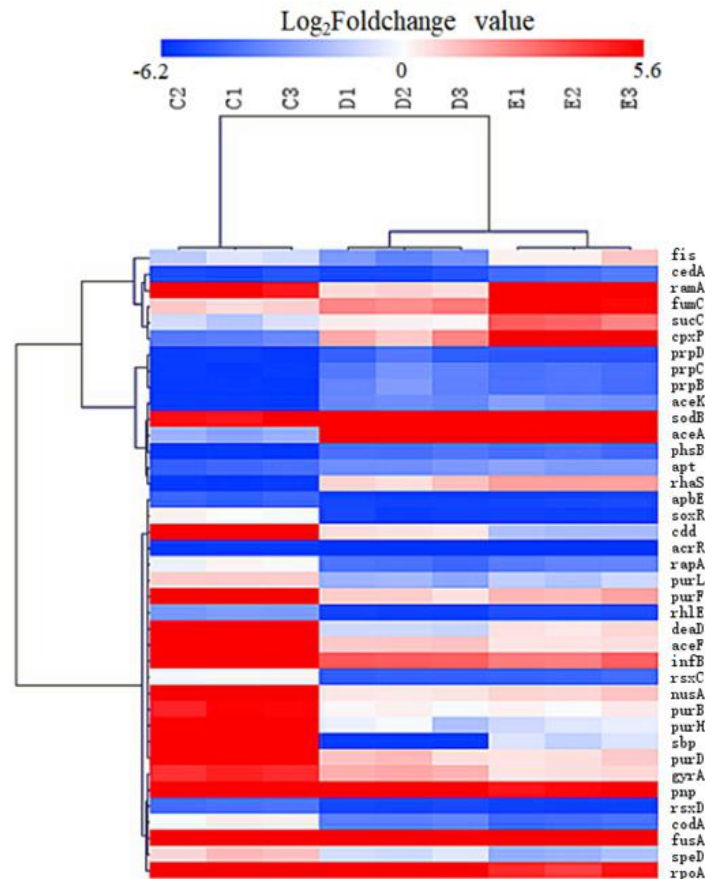

312

313 **Fig. 5. Heatmap of the candidate key genes involved in the sub-MIC induced**  
 314 **ENR resistance in *S. Enteritidis*.** “C<sub>1</sub>, C<sub>2</sub>, C<sub>3</sub>”, “D<sub>1</sub>, D<sub>2</sub>, D<sub>3</sub>”, “E<sub>1</sub>, E<sub>2</sub>, E<sub>3</sub>” represent triplicate  
 315 of mutants 32M (1/2M), 16M (1/32M) and 8M (1/128M); “red colour” represents gene  
 316 up-regulation, “blue colour” represents gene down-regulation, and the shade of the color indicates  
 317 the degree of gene expression.

318

319 The 573 co-DEGs were blasted in the CARD database, and the results showed  
 320 that there were 19 known drug resistance genes (**Tab. 3**).

321

322

**Tab. 3. Resistance-related DEGs blasted in the CARD**

| Gene name   | Fold change |        |        | Non-redundant protein sequence description |
|-------------|-------------|--------|--------|--------------------------------------------|
|             | C vs B      | D vs B | E vs B |                                            |
| <i>ramA</i> | 14.52       | 6.24   | 47.54  | Transcriptional activator RamA             |
| <i>rpoB</i> | 10.30       | 5.45   | 3.48   | Hypothetical protein SARI_03509            |
| <i>fusA</i> | 9.80        | 5.49   | 4.45   | Elongation factor G                        |
| <i>rpsL</i> | 9.62        | 3.20   | 2.84   | 30S ribosomal protein S12                  |
| <i>typA</i> | 6.54        | 2.89   | 3.31   | Ribosome-dependent GTPase TypA             |

|                |       |       |       |                                                                   |
|----------------|-------|-------|-------|-------------------------------------------------------------------|
| <i>lepB</i>    | 6.52  | 3.86  | 3.66  | Signal peptidase I                                                |
| <i>acrB</i>    | 6.16  | 4.83  | 4.66  | Multidrug efflux RND transporter permease subunit                 |
| <i>rplU</i>    | 5.80  | 2.88  | 5.38  | 50S ribosomal protein L21                                         |
| <i>gyrA</i>    | 4.98  | 3.38  | 2.24  | DNA topoisomerase (ATP-hydrolyzing) subunit A                     |
| <i>rpoC</i>    | 4.75  | 3.78  | 3.94  | DNA-directed RNA polymerase subunit beta'                         |
| <i>ompC</i>    | 4.66  | 4.67  | 3.93  | Porin OmpC                                                        |
| <i>acrE</i>    | 4.52  | 9.16  | 7.65  | Efflux RND transporter periplasmic adaptor subunit                |
| <i>rsxE</i>    | 3.95  | 2.19  | 2.39  | Electron transport complex subunit E                              |
| <i>gyrB</i>    | 3.91  | 2.26  | 2.12  | DNA gyrase subunit B                                              |
| <i>soxR</i>    | 3.58  | -3.45 | -3.57 | Redox-sensitive transcriptional activator SoxR                    |
| <i>betI</i>    | 2.77  | 2.69  | 4.50  | TetR/AcrR family transcriptional regulator                        |
| <i>acrA</i>    | 2.46  | 2.15  | 2.32  | Multidrug efflux RND transporter periplasmic adaptor subunit AcrA |
| <i>acrR</i>    | 2.02  | -5.26 | -4.17 | TetR-family transcriptional regulator                             |
| <i>I_00145</i> | -5.56 | -3.85 | -2.50 | Cryptic aminoglycoside N-acetyltransferase AAC(6')-Iy/Iaa         |

323 Note: "B", "C", "D", "E" represent parental strain, mutants 32M (1/2M), 16M (1/32M) and 8M (1/128M),  
 324 respectively.

325 Based on the results of the transcriptomic analysis, the expression of the OMPs  
 326 and MDR efflux pump transporter genes were presented in **Tab. 4**. The mRNA  
 327 expression of OMPs (OmpA, OmpC, OmpD, and OmpF) was showed that only the  
 328 *ompF* down-regulated in the reduced susceptibility mutant 8M (1/128M) and  
 329 resistance mutant 32M (1/2M), so the decreasing OMPs permeability would not be a  
 330 determining factors for mutants with resistance level  $\geq 8$ MIC. Only *acrA*, *acrB*, *acrD*,  
 331 *acrE*, *emrB*, *mdfA*, and *mdtB* genes had a significant up-regulation expression of  
 332 MDR efflux pump genes compared with the parental strain. However, the MDR  
 333 efflux pump genes of *acrF* and *mdtK* were not activated in mutants compared with the  
 334 parental strain. The expression levels of *acrB* and *acrE* in mutants were much higher  
 335 than other up-regulation genes; meanwhile, only the AcrAB efflux pump had two  
 336 up-regulation subunits in all mutants ( $\geq 8$ MIC) compared with the parental strain. Our  
 337 results indicated that overexpression of AcrAB efflux pump predominantly increase in  
 338 resistance to ENR in mutants ( $\geq 8$ MIC), whereas AcrD, AcrEF, EmrAB, MdfA and

339 MdtK efflux pump facilitated the reduced susceptibility to ENR in mutants ( $\geq 8$ MIC).  
 340 These gene expression trends were generally consistent with the qRT-PCR results  
 341 (Fig. 2).

342

343 **Tab. 4. Expression levels of MDR efflux pump and OMPs in the transcriptome of**  
 344 ***S. Enteritidis* mutants**

| Gene name   | Fold Change |        |        | Non-redundant protein sequence description                        |
|-------------|-------------|--------|--------|-------------------------------------------------------------------|
|             | C vs B      | D vs B | E vs B |                                                                   |
| <i>ompA</i> | 1.75        | 2.40   | 2.08   | Membrane protein                                                  |
| <i>ompC</i> | 4.66        | 4.67   | 3.93   | Porin OmpC                                                        |
| <i>ompD</i> | 1.17        | 15.41  | 6.80   | Porin OmpD                                                        |
| <i>ompF</i> | -2.38       | 1.06   | -3.45  | Porin OmpF                                                        |
| <i>mdsC</i> | -1.20       | -1.33  | -1.96  | Multidrug efflux transporter outer membrane subunit MdsC          |
| <i>acrA</i> | 2.46        | 2.15   | 2.32   | Multidrug efflux RND transporter Periplasmic adaptor subunit AcrA |
| <i>acrB</i> | 6.16        | 4.83   | 4.66   | Multidrug efflux RND transporter permease subunit                 |
| <i>tolC</i> | 1.03        | 2.00   | 2.48   | Outer membrane protein TolC                                       |
| <i>acrD</i> | 1.80        | 2.99   | 4.42   | Multidrug efflux RND transporter permease AcrD                    |
| <i>acrE</i> | 4.52        | 9.16   | 7.65   | Efflux RND transporter periplasmic adaptor subunit                |
| <i>acrF</i> | -1.59       | -1.59  | -1.28  | Multidrug efflux RND transporter permease subunit                 |
| <i>emrA</i> | 1.22        | 1.34   | 1.12   | Multidrug efflux MFS transporter periplasmic adaptor subunit EmrA |
| <i>emrB</i> | 1.97        | 2.68   | 2.60   | Multidrug efflux MFS transporter permease subunit EmrB            |
| <i>mdfA</i> | 1.33        | 1.88   | 2.98   | MFS transporter                                                   |
| <i>mdtK</i> | -1.49       | -1.19  | 1.35   | Multidrug efflux MATE transporter MdtK                            |
| <i>mdsA</i> | -1.79       | -2.22  | -2.08  | Multidrug efflux RND transporter periplasmic adaptor subunit MdsA |
| <i>mdsB</i> | -2.00       | -2.08  | -2.44  | Multidrug efflux RND transporter permease subunit MdsB            |
| <i>mdtA</i> | 1.19        | -1.37  | 1.13   | Multidrug efflux RND transporter subunit MdtA                     |
| <i>mdtB</i> | 1.64        | 1.52   | 2.63   | Multidrug efflux RND transporter permease subunit MdtB            |
| <i>mdtC</i> | -1.05       | 1.18   | 1.59   | Multidrug efflux RND transporter                                  |

|             |       |      |      |                                                             |
|-------------|-------|------|------|-------------------------------------------------------------|
|             |       |      |      | permease subunit MdtC                                       |
| <i>macA</i> | -1.08 | 1.02 | 1.50 | Macrolide transporter subunit MacA                          |
| <i>macB</i> | 1.04  | 1.47 | 1.53 | Macrolide ABC transporter ATP-binding protein/permease MacB |

345 Note: The genes also detected in RT-PCR were shown in bold. “B”, “C”, “D”, “E” represent parental strain,  
346 mutants 32M (1/2M), 16M (1/32M) and 8M (1/128M), respectively.

## 347 **4 Discussions**

348 This study documented a versatile adaptive response of the *S. Enteritidis* under a  
349 long-term exposure to sub-MICs of ENR which resulted in a diversity of phenotypes  
350 including OMPs and MDR efflux pumps expression, QRDR mutation and  
351 transcriptomic changes. Mutations in the bacteria DNA gyrase (*gyrA* and *gyrB*) and  
352 topoisomerase IV (*parC* and *parE*) genes, as well as up-regulation of MDR efflux  
353 genes, were known to mediate bacterial resistance to FQs<sup>[7, 26]</sup>. In this study, the  
354 mutation of *gyrA* (Ser83Phe, Ser83Tyr, or Asp87Gly) was observed in all mutant  
355 strains except in reduced susceptible strains of 2M (1/2M), 2M (1/32M), 4M (1/2M)  
356 and 8M (1/2M) (**Tab. 1**). This is in consistence with the fact that the most common  
357 QRDR mutations occur in the *gyrA* gene, resulting in substitutions of Ser-83 with Tyr,  
358 Phe, or Ala, and of Asp-87 with Asn, Gly, or Tyr in *Salmonella* isolates<sup>[26-28]</sup>. Previous  
359 study demonstrated that point mutations were also observed in *parC* and *parE* with  
360 the concomitant presence of mutation in *gyrA* of *Salmonella* Paratyphi isolates with  
361 resistance to nalidixic acid<sup>[29]</sup>. It was also found that clinical *Salmonella* isolates  
362 evolved high-level of ciprofloxacin (CIP) resistance that was accompanied by  
363 additional mutations in GyrA and ParE<sup>[30]</sup>. Interestingly, no mutation was found in  
364 *gyrB*, *parC* or *parE* gene in our study, even in the higher level of resistance group  
365 ( $\geq 16$ MIC) (**Tab. 1**). One possible reason for this phenomenon was that the FQs  
366 resistance level of clinical isolates was much higher than the resistant level of the  
367 mutants which were selected in our study. Previous research showed that mutations in  
368 *gyrA* and *parC* genes conferred a measurable fitness advantage over strains without  
369 these mutations<sup>[31]</sup>. According to the growth curve of *Salmonella* under exposure to a  
370 series of sub-MICs of ENR, it was revealed that the greater the selection pressure, the  
371 lower growth rates in our observation (**Fig. S4**). Because of the resistance level of

372 resistants in this study was relatively low, so another reason might be that a single  
373 mutation in *gyrA* was sufficient to impose a loss of fitness. Several prior studies had  
374 shown that exposure to sub-MICs of CIP could select for first-step mutations that  
375 confer stable low-level resistance from both target mutations and efflux mechanism<sup>[32,</sup>  
376 <sup>33]</sup>. In our study, no mutation was observed in *gyrA* gene selected by close-to-MIC  
377 concentrations ( $1/2 \times \text{MIC}$ ) of ENR in all reduced susceptibility mutants in the early  
378 stage of resistance development ( $\leq 8\text{MIC}$ ), but mutations of *gyrA* gene were obtained  
379 in all reduced susceptibility mutants except 2M( $1/32\text{M}$ ) selected by with low  
380 sub-MICs ( $\leq 1/4 \times \text{MIC}$ ) of ENR (**Tab. 1**). This might occur because the mutants  
381 ( $\leq 8\text{MIC}$ ) emerged fast under the close-to-MIC concentrations selection. In this  
382 process, no mutants had been selected in the population. So the initial adaptation  
383 manner of *Salmonella* included overexpression of efflux pumps and decrease of  
384 OMPs to rapidly emerge reduced susceptibility. While low sub-MIC of ENR had little  
385 influence on the survival of *Salmonella*, the effect of MDR efflux pumps was not  
386 obvious, and mutants with the susceptibility level of  $\leq 8\text{MIC}$  were selected by a  
387 long-term. In addition, transcriptomic data showed that *gyrA* and *gyrB* were  
388 up-regulated in all mutants (**Tab. 3**). It was reported that the expression of *gyrA* and  
389 *parC* increased significantly in resistant *Salmonella enterica* serovar Typhimurium (*S.*  
390 Typhimurium) selected *in vivo*, but no changes in the expression of these genes were  
391 detected in *S. Typhimurium* selected *in vitro*<sup>[12]</sup>. Whether the up-regulated expression  
392 of these genes was a determinant of FQs resistance possibility required further  
393 investigation.

394 In addition, mechanisms affecting the cell envelope by increased/decreased  
395 expression of OMPs and/or efflux of FQs also contributed to the intracellular  
396 accumulation of FQs<sup>[21, 34]</sup>. In our study, The relative expression of outer  
397 membrane-related genes (*ompC*, *ompD* and *ompF*) were all down-regulated in the  
398 mutants with resistance level less than 8MIC, and the amount of down-regulation  
399 decreased with the increase of resistance level. Previous research showed that  
400 alterations in OMPs including disappearance of some or all of these proteins (OmpA,  
401 OmpC, OmpD and OmpF) enriched resistance to FQs in *Salmonella* isolates with the

402 MIC value  $\geq 32$   $\mu\text{g}/\text{mL}$ <sup>[7]</sup>. However, when the resistance level exceeds 8MIC, the  
403 *ompC* and *ompD* gene were overexpressed in all mutants, while the *ompF* gene was  
404 still suppressed in all mutants in our results (**Fig. 2**). This was also confirmed by the  
405 the transcriptomic results that the expression of porin-encoding genes (*ompA*, *ompC*,  
406 and *ompD*) except *ompF* were up-regulated in all mutants with susceptibility level  
407  $\geq 8\text{MIC}$  (**Tab. 4**). OmpF has been experimentally determined to be the most important  
408 porin in the resistant mutants selected by incrementally increasing CIP concentrations  
409 <sup>[35]</sup>. In contrast to other antibiotics, ENR was reported to have higher affinities to  
410 OmpF channel in *Escherichia coli* (*E. coli*)<sup>[36]</sup>, and down-regulation of *ompF* had  
411 been associated with the decrease in the accumulation of FQs in *E. coli* <sup>[37, 38]</sup>. Our  
412 data also showed that the down-regulation of *ompF* played the most important role in  
413 the initial stages of ENR resistance emergence.

414 It has been reported that the multidrug resistance (MDR) efflux pumps  
415 AcrAB-TolC, AcrEF, EmrAB, MdfABC and MdtK contributed to FQ resistance in  
416 *Salmonella*<sup>[8]</sup>. Our results revealed that AcrEF and MdtK efflux may have little  
417 contribution to ENR resistance at early stage, while AcrAB, EmrAB and MdfABC  
418 may play an important role in ENR resistance, since the expression level of *acrB*,  
419 *emrB*, *mdfA* was increased with increased level of FQs resistance and *acrB* gene was  
420 significantly increased, while the expression of the *acrF* and *mdtK* gene  
421 down-regulated as the susceptibility reduced (**Fig. 2**). This was also shown in the  
422 transcriptomic profiles that only *acrA*, *acrB*, *acrD*, *acrE*, *emrB*, *mdfA*, *mdtB* genes  
423 were significantly up-regulated (**Tab. 4**). Different performance of efflux pumps  
424 towards FQ pressure was also reported in the previous study that the expression level  
425 of *acrB* was increased and *acrF* decreased in CIP-resistants of *Salmonella* with the  
426 MIC value  $\geq 2$   $\mu\text{g}/\text{mL}$  <sup>[34]</sup>.

427 Previous study has shown that the *acrAB* or *acrEF* genes conferred multidrug  
428 resistance to numerous antibiotics, the *emrAB* gene conferred resistance to novobiocin  
429 and nalidixic acid, the *mdfA* gene conferred resistance to tetracycline,  
430 chloramphenicol, norfloxacin and doxorubicin and the *mdtK* gene conferred resistance  
431 to norfloxacin and doxorubicin in *S. Typhimurium*<sup>[39]</sup>. Therefore, we speculate that all

432 these efflux pumps can efflux ENR, but there may be differences in substrate affinity  
433 between them, resulting in differences in their expression. Although MDR efflux  
434 pumps conferred only low-level resistance (2- to 8-fold increase in MIC values)<sup>[40, 41]</sup>,  
435 AcrB, EmrB, and MdfA were still working together with QRDR mutations beyond  
436 16×MIC resistance levels. It was demonstrated in our results that as the expression of  
437 OMPs down-regulated, the expression level of *acrB*, *emrB*, *mdfA* were up-regulated,  
438 indicating OMP and MDR efflux pumps work alternately.

439 It was demonstrated that a feedback mechanism between nine homologous  
440 functional efflux pump genes through co-regulation of *ramA* and *marA* was found in *S.*  
441 *Typhimurium*<sup>[42, 43]</sup>. The marbox operon is responsible for producing the *marA*, *soxRS*  
442 and *ramA* transcriptional activator to activate *acrAB* transcription. But *acrR* is  
443 independent of *mar-sox-rob* for controlling the expression of *acrB* in *Salmonella*<sup>[7, 44]</sup>.

444 In our study, *ramA* were overexpressed in all mutants, while *soxR* and *acrR* gene  
445 were up-regulated in resistant mutant 32M (1/2M), but down-regulated in reduced  
446 susceptible mutant 8M (1/128M), resistant mutant 16M (1/32M) (**Tab. S2**). The  
447 overexpression of *marA* was only observed in resistant mutant 32M (1/2M), but  
448 difference expression in reduced susceptible mutant 8M (1/128M), resistant mutant  
449 16M (1/32M). The expression of *ramA* was consistent with previous studies, and the  
450 differential expression of *soxR*, *marA* and *acrR* gene might be an important reason for  
451 the different expression levels of efflux pumps.

452 Beyond the role of target mutation, OMPs and MDR efflux pumps involved in  
453 FQs resistance, there is an increasingly recognized role for cellular processes such as  
454 purines metabolism. It was confirmed that purines metabolism are required for DNA  
455 and RNA synthesis<sup>[45]</sup>. Previous study showed that key genes involved in nucleotide  
456 biosynthesis were identified, including *purA* and *purD* in purine synthesis<sup>[46]</sup>. Another  
457 research showed that *purL* or *purM* mutant disrupted purine biosynthesis in  
458 *Burkholderia*<sup>[47]</sup>. It was also demonstrated that *purA* gene was up-regulated in  
459 olaquinox resistance *E. coli*<sup>[24]</sup>. Previous study showed that KEGG pathway of  
460 purine metabolism, pyrimidine metabolism was enriched in the proteomics analysis of  
461 FQs resistance *E. coli*<sup>[48]</sup>. The CytosHubba result showed that *purB*, *purC*, *purD*, *purF*,



462 *purH*, *purK*, *purL*, *purM*, *purN* and *purT* were the hub genes and MCODE revealed  
463 that the main biological processes all involved in purine metabolism in this study  
464 (**Tab. 2**). This study have revealed that purine metabolism was the highly activate  
465 pathway by bioinformatics analysis. It remains to be determined whether purine  
466 metabolism and the other changes observed in the ENR mutant is a key pathway to  
467 FQs resistance.

468

## 469 **5 Conclusions**

470 In summary, this study shows an evolutionary process for salmonella on FQs  
471 resistance. mutants firstly decreased OMPs permeability to rapidly adapt the selected  
472 pressure circumstances in the initial stage of resistance emergence, then the  
473 expression of efflux pumps was up-regulated in the following process and QRDR  
474 mutation was obtained, resulting in a higher resistance level under a long-term  
475 selected pressure of the sub-MIC antibiotics *in vitro*. Hub genes (*purB*, *purC*, *purD*,  
476 *purF*, *purH*, *purK*, *purL*, *purM*, *purN* and *purT*) and the remarkable biological  
477 processes of purine metabolism were identified by bioinformatics analysis of  
478 transcriptomic profiles. This suggests that changes in FQs resistance based on gene  
479 expression patterns and metabolic pathways. However, the interplay between FQs  
480 resistance mechanisms and metabolic pathway requires further exploration.

481

482

## 483 **Abbreviations**

484 CFU, Colony-Forming Units; CICC, China Center of Industrial Culture Collection ;  
485 CIP, Ciprofloxacin; CLSI, Clinical and Laboratory Standards Institute; DEGs,  
486 Differentially expressed genes; *E. coli*, *Escherichia coli*; FQs, Fluoroquinolones; GO,  
487 Gene Ontology; KEGG, Kyoto Encyclopedia of Genes and Genomes; OMP, outer  
488 membrane porin; PCR, Polymerase Chain Reaction; LB, Luria-Bertani broth; MDR,  
489 multidrug resistance; co-DEGs, co-differentially expressed genes; QRDRs, quinolone  
490 resistant determining regions; *S. Enteritidis*, *Salmonella enterica serovar Enteritidis*;

491 *Salmonella enterica* serovar Typhimurium, *S.* Typhimurium; ENR, Enrofloxacin;  
492 MIC, Minimum inhibitory concentration; Sub-MIC, Sub-inhibitory concentration;  
493 TSA, Tryptone soybean agar;

494

#### 495 **Conflict of interest statement**

496 The authors declare that the research was conducted in the absence of any  
497 commercial or financial relationships that could be construed as a potential conflict of  
498 interest.

#### 499 **Acknowledgments**

500 This work was supported by the National Natural Science Foundation of China (3207  
501 2921 & 31502115).

#### 502 **Author Contributions**

503 Conceived and designed the experiments: YG GC. Performed the experiments: YG JH  
504 LH. Analyzed the data: YG HH GC. Contributed reagents/materials/analysis tools:  
505 GC ZY. Wrote the paper: YG LH CW GC.

506

507

508

509 **Supplementary data**

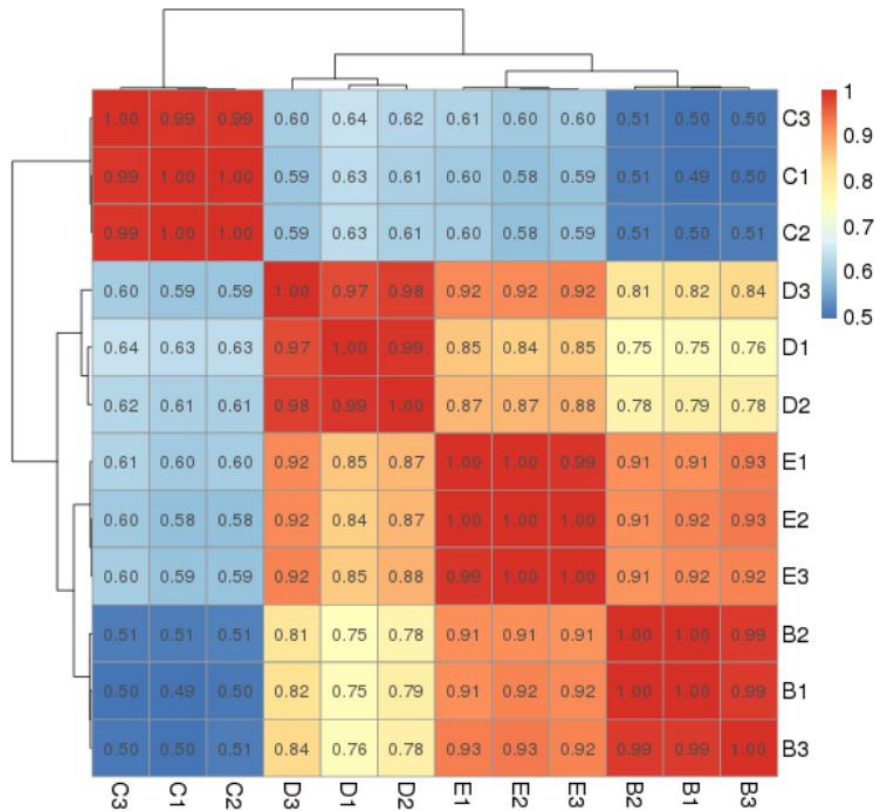

510

511 **Figure S1.** Correlation tests for the parental strain (Group B), strain 32M (1/2M)

512 (Group C), strain 16M (1/8M) (Group D) and strain 8M (1/128M) (Group E)

513 **(triplicates in each group).** The abscissa and ordinate in the figure are sample

514 numbers. The closer the block value is to 1, the higher the similarity is.

515

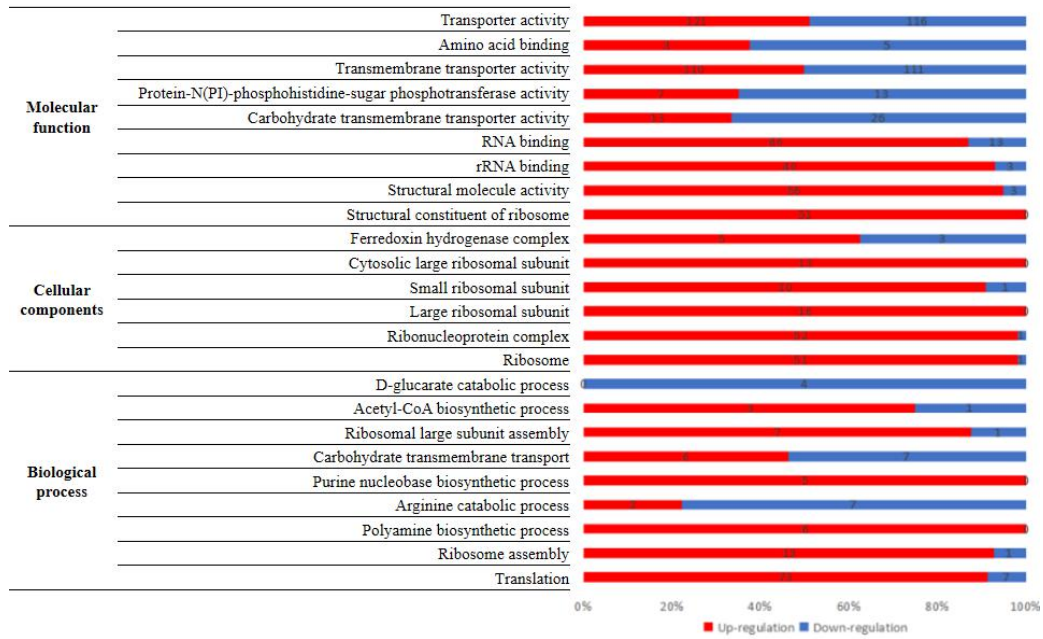

516  
517  
518  
519  
520

**Fig. S2. Enrichment of co-DEGs in GO Term**

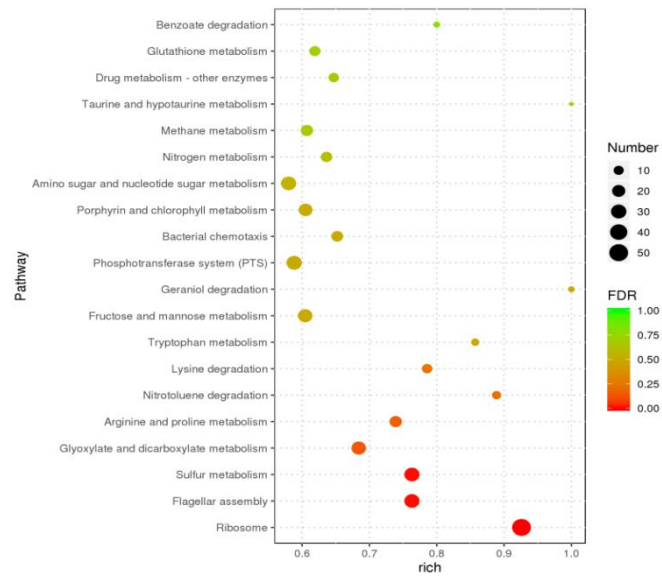

(A)

521  
522  
523  
524

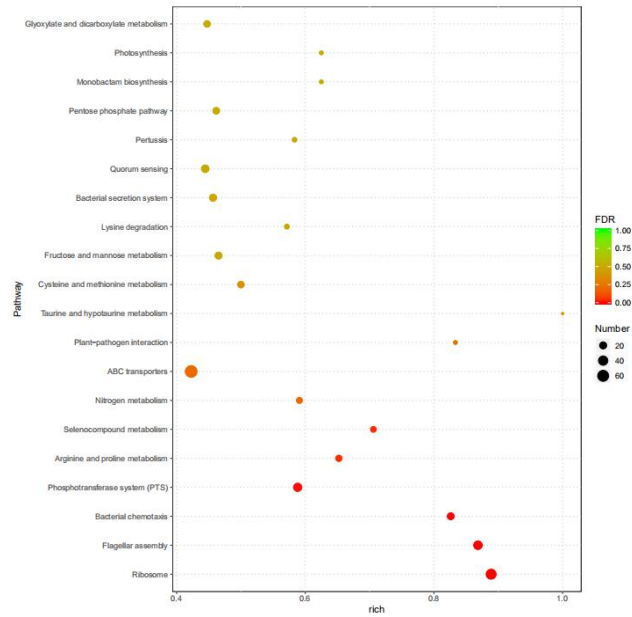

(B)

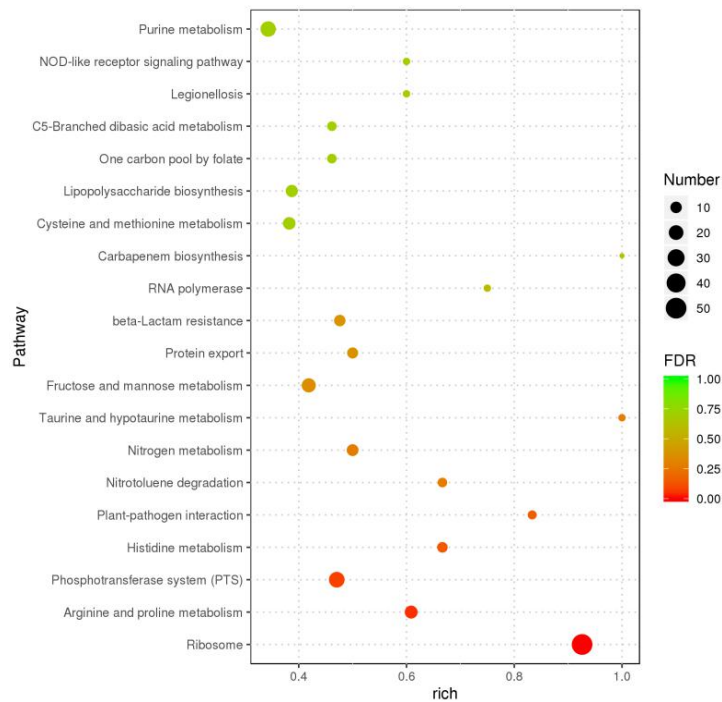

(C)

**Fig. S3.** Pathway enrichment scatter plot of DEGs. (A) The top 20 KEGG pathway of B vs C group; (B) The top 20 KEGG pathway of B vs D group; (C) The top 20 KEGG pathway of B vs E group.

525  
526  
527  
528

529  
530  
531  
532  
533  
534  
535  
536  
537

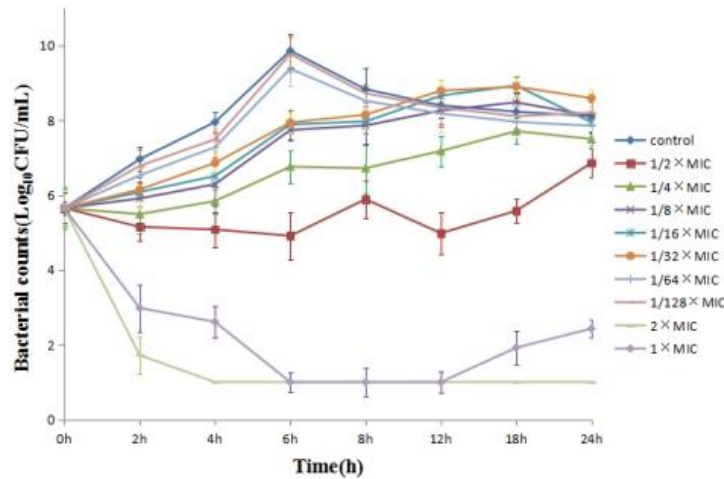

538

539 **Fig. S4.** Growth curves of *Salmonella enterica* CICC 21527 in the TSB broth under  
540 sub-MIC of enrofloxacin

541

542 **Tab. S1. Primers used for identification OMPs and MDR efflux pumps of *Salmonella***

| Gene name   | Primer | Sequences (5' -3' )     | Fragment size (bp) | Reference          |
|-------------|--------|-------------------------|--------------------|--------------------|
| <i>gapA</i> | gapA-F | CGCATCTCAGAACATCATC     | 130                | This study         |
|             | gapA-R | AGGTCAACAACGGATACG      |                    |                    |
| <i>ompC</i> | ompC-F | GTGGATGGTCTGGACTTC      | 177                | This study         |
|             | ompC-R | TTAGCGGTGTTGTTCTGAT     |                    |                    |
| <i>ompD</i> | ompD-F | TGTTGCCACCTACCGTAACA    | 200                | Ivan et al. (2011) |
|             | ompD-R | GGTCGCCAGGTAGATGTTGT    |                    |                    |
| <i>ompF</i> | ompF-F | GTTGAATCCTATACCGATATGG  | 300                | This study         |
|             | ompF-R | GAGTTAATGCTGTGGTTGTC    |                    |                    |
| <i>acrB</i> | acrB-F | CAATATCCGACGATTGCGC     | 194                | Kim et al. (2016)  |
|             | AcrB-R | TATCGATACCGTTCATATTCTGT |                    |                    |
| <i>acrF</i> | AcrF-F | ATTCCTACCATCGCTGTTC     | 121                | This study         |
|             | AcrF-R | CCACTATCGCATCGTCAA      |                    |                    |
| <i>emrB</i> | EmrB-F | CCTGTTGCTGAATAACTATCC   | 136                | This study         |
|             | EmrB-R | CGATGCCAATCACCAGTA      |                    |                    |
| <i>mdfA</i> | MdfA-F | CGATATGAGTAAAGGAACGG    | 266                | Sun et al. (2011)  |
|             | MdfA-R | AGCATCAGCAGTAGCCAAAGAA  |                    |                    |
| <i>mdtK</i> | MdtK-F | CGTCGGCATTGTTGATGGCTGT  | 94                 | Sun et al. (2011)  |
|             | MdtK-R | CACGACCTCAGGGTTGTCATTG  |                    |                    |

543

544 **Tab. S2. Differently expressed genes between groups of the Co-DEGs among**  
545 **three groups of mutants**

| Gene name | Fold change CvsB | Fold change DvsB | Fold change EvsB | NR |
|-----------|------------------|------------------|------------------|----|
|-----------|------------------|------------------|------------------|----|

|             |       |       |       |                                                                                                        |
|-------------|-------|-------|-------|--------------------------------------------------------------------------------------------------------|
| <i>deaD</i> | 28.30 | 4.62  | 6.74  | DEAD/DEAH family<br>ATP-dependent RNA helicase                                                         |
| <i>purD</i> | 20.78 | 6.28  | 5.10  | Phosphoribosylamine--glycine<br>ligase                                                                 |
| <i>acrR</i> | 2.02  | -5.26 | -4.17 | TetR-family transcriptional<br>regulator                                                               |
| <i>rhlE</i> | 20.16 | 3.85  | 6.05  | ATP-dependent RNA helicase<br>RhlE                                                                     |
| <i>rsxD</i> | 18.11 | 6.91  | 4.03  | Electron transport complex<br>subunit RsxD                                                             |
| <i>marA</i> | 14.52 | 6.24  | 47.54 | Transcriptional activator RamA                                                                         |
| <i>infB</i> | 12.44 | 3.70  | 3.09  | Initiation factor IF2-alpha                                                                            |
| <i>priB</i> | 12.40 | 9.15  | 9.60  | Primosomal replication protein<br>N                                                                    |
| <i>aceF</i> | 12.40 | 2.95  | 2.22  | Pyruvate dehydrogenase<br>complex<br>dihydrolipoyllysine-residue<br>acetyltransferase                  |
| <i>purH</i> | 11.70 | 3.14  | 2.92  | Bifunctional<br>phosphoribosylaminoimidazole<br>carboxamide<br>formyltransferase/IMP<br>cyclohydrolase |
| <i>rsxC</i> | 11.52 | 2.98  | 3.13  | Electron transport complex<br>subunit RsxC                                                             |
| <i>purF</i> | 10.04 | 3.49  | 3.97  | Amidophosphoribosyltransfera<br>se                                                                     |
| <i>fusA</i> | 9.80  | 5.49  | 4.45  | Elongation factor G                                                                                    |
| <i>speD</i> | 9.06  | 5.88  | 4.10  | Adenosylmethionine<br>decarboxylase                                                                    |
| <i>nusA</i> | 8.83  | 2.3   | 2.54  | Transcription<br>termination/antitermination<br>protein NusA                                           |
| <i>purB</i> | 8.76  | 3.15  | 3.06  | Adenylosuccinate lyase                                                                                 |
| <i>codA</i> | 8.37  | 3.45  | 2.38  | Cytosine deaminase                                                                                     |
| <i>fis</i>  | 8.18  | 5.43  | 14.00 | DNA-binding transcriptional<br>regulator Fis                                                           |
| <i>speE</i> | 7.84  | 7.16  | 4.03  | Polyamine<br>aminopropyltransferase                                                                    |
| <i>purL</i> | 6.94  | 3.43  | 3.92  | Phosphoribosylformylglycinam<br>idine synthase                                                         |
| <i>lepB</i> | 6.52  | 3.86  | 3.66  | Signal peptidase I                                                                                     |
| <i>rapA</i> | 5.71  | 2.05  | 2.45  | RNA polymerase-associated<br>protein RapA                                                              |



|             |         |       |       |                                                                 |
|-------------|---------|-------|-------|-----------------------------------------------------------------|
| <i>gyrA</i> | 4.98    | 3.38  | 2.24  | DNA topoisomerase<br>(ATP-hydrolyzing) subunit A                |
| <i>pnp</i>  | 4.87    | 2.99  | 2.13  | Polynucleotide phosphorylase                                    |
| <i>soxR</i> | 3.58    | -3.45 | -3.57 | Redox-sensitive transcriptional<br>activator SoxR               |
| <i>purR</i> | 3.42    | 4.72  | 5.73  | HTH-type transcriptional<br>repressor PurR                      |
| <i>apt</i>  | 3.40    | 7.33  | 7.78  | Adenine<br>phosphoribosyltransferase                            |
| <i>cdd</i>  | 2.94    | -2.27 | -4.76 | Cytidine deaminase                                              |
| <i>cedA</i> | 2.30    | 2.50  | 5.81  | Cell division activator Ceda                                    |
| <i>cpxP</i> | -2.17   | 2.65  | 14.14 | Cell-envelope stress modulator<br>CpxP                          |
| <i>sodB</i> | -2.22   | 3.42  | 2.98  | Superoxide dismutase, partial                                   |
| <i>phsB</i> | -5.00   | 2.60  | 2.31  | Thiosulfate reductase electron<br>transport protein PhsB        |
| <i>fumC</i> | -6.67   | -3.57 | -2.33 | Fumarate hydratase class II                                     |
| <i>sucC</i> | -7.69   | -4.55 | -2.17 | ADP-forming succinate--CoA<br>ligase subunit beta               |
| <i>rhaS</i> | -16.67  | 2.91  | 3.58  | HTH-type transcriptional<br>activator RhaS                      |
| <i>aceA</i> | -25.00  | -2.17 | -2.78 | Isocitrate lyase                                                |
| <i>prpD</i> | -33.33  | -3.33 | -7.14 | Bifunctional 2-methylcitrate<br>dehydratase/aconitate hydratase |
| <i>aceK</i> | -33.33  | -2.56 | -2.44 | Bifunctional isocitrate<br>dehydrogenase<br>kinase/phosphatase  |
| <i>prpC</i> | -50.00  | -4.00 | -5.56 | 2-methylcitrate synthase                                        |
| <i>prpB</i> | -100.00 | -3.70 | -5.56 | Methylisocitrate lyase                                          |

546

547

## 548 **References**

- 549 [1] MARIA H, ZHAO S, JAMES P, et al. Comparative Genomic Analysis and Virulence Differences  
550 in Closely Related *Salmonella enterica* Serotype Heidelberg Isolates from Humans, Retail Meats, and  
551 Animals [J]. *Genome Biology and Evolution*. 2014, (5): 1046-68.
- 552 [2] HENDRIKSEN R S, VIEIRA A R, KARLSMOSE S, et al. Global monitoring of *Salmonella*  
553 serovar distribution from the World Health Organization Global Foodborne Infections Network  
554 Country Data Bank: results of quality assured laboratories from 2001 to 2007 [J]. *Foodborne Pathogens*  
555 *and Disease*. 2011, 8(8): 887-900.
- 556 [3] MARTINEZ M, MCDERMOTT P, WALKER R. Pharmacology of the fluoroquinolones: A  
557 perspective for the use in domestic animals [J]. *Veterinary Journal*. 2006, 172(1): 10-28.
- 558 [4] HOPKINS K L, DAVIES R H, THRELFALL E J. Mechanisms of quinolone resistance in  
559 *Escherichia coli* and *Salmonella*: Recent developments [J]. *International Journal of Antimicrobial*

- 560 Agent. 2005, 25(5): 358-73.
- 561 [5] LO N W S, CHU M T, LING J M. Increasing quinolone resistance and multidrug resistant isolates  
562 among *Salmonella enterica* in Hong Kong [J]. *Journal of Infection*. 2012, 65(6): 528-40.
- 563 [6] FÁBREGA A, MADURGA S, GIRALT E, et al. Mechanism of action of and resistance to  
564 quinolones [J]. *Microbial Biotechnology*. 2009, 2(1): 40-61.
- 565 [7] RUSHDY A A, MABROUK M I, ABU-SEF A H, et al. Contribution of different mechanisms to  
566 the resistance to fluoroquinolones in clinical isolates of *Salmonella enterica* [J]. *Brazilian Journal of*  
567 *Infectious Diseases*. 2013, 17(4): 431-7.
- 568 [8] NISHINO K, LATIFI T, GROISMAN E A. Virulence and drug resistance roles of multidrug  
569 efflux systems of *Salmonella enterica* serovar Typhimurium [J]. *Molecular Microbiology*. 2010, 59(1):  
570 126-41.
- 571 [9] SEIJI Y, SAYA N, AIKO F, et al. Cooperation of the multidrug efflux pump and  
572 lipopolysaccharides in the intrinsic antibiotic resistance of *Salmonella enterica* serovar Typhimurium  
573 [J]. *Journal of Antimicrobial Chemotherapy*. 2013, (5): 1066-70.
- 574 [10] ANDERSSON D I, HUGHES D. Microbiological effects of sublethal levels of antibiotics [J].  
575 *Nature Reviews Microbiology*. 2014, 12(7): 465.
- 576 [11] CHOW L K M, GHALY T M, GILLINGS M. A survey of sub-inhibitory concentrations of  
577 antibiotics in the environment [J]. *Journal of Environmental*. 2021, 99: 21-7.
- 578 [12] LI L, DAI X, WANG Y, et al. RNA-seq-based analysis of drug-resistant *Salmonella enterica*  
579 serovar Typhimurium selected in vivo and in vitro [J]. *Plos One*. 2017, 12(4): e0175234.
- 580 [13] HORST M, SCHUURMANS J M, SMID M C, et al. De novo acquisition of resistance to three  
581 antibiotics by *Escherichia coli* [J]. *Microbial drug resistance*. 2011, 17(2): 141-7.
- 582 [14] THI T D, LÓPEZ E, RODRÍGUEZ-ROJAS A, et al. Effect of *recA* inactivation on mutagenesis of  
583 *Escherichia coli* exposed to sublethal concentrations of antimicrobials [J]. *Journal of Antimicrobial*  
584 *Chemotherapy*. 2011, 66(3): 531.
- 585 [15] KOHANSKI M A, DEPRISTO M A, COLLINS J J. Sublethal antibiotic treatment leads to  
586 multidrug resistance via radical-induced mutagenesis [J]. *Molecular cell*. 2010, 37(3): 311-20.
- 587 [16] BALASHOV S, HUMAYUN M Z. Mistranslation induced by streptomycin provokes a  
588 *RecABC/RuvABC*-dependent mutator phenotype in *Escherichia coli* cells [J]. *Journal of Molecular*  
589 *Biology*. 2002, 315(4): 513-27.
- 590 [17] LÓPEZ E, ELEZ M, MATIC I, et al. Antibiotic-mediated recombination: ciprofloxacin stimulates  
591 SOS-independent recombination of divergent sequences in *Escherichia coli* [J]. *Molecular*  
592 *Microbiology*. 2010, 64(1): 83-93.
- 593 [18] BEABER J W, HOCHHUT B, WALDOR M K. SOS response promotes horizontal dissemination  
594 of antibiotic resistance genes [J]. *Nature*. 2004, 427(6969): 72-4.
- 595 [19] WISTRAND-YUEN E, KNOPP M, HJORT K, et al. Evolution of high-level resistance during  
596 low-level antibiotic exposure [J]. *Nature Communications*. 2018, 9(1): 1599.
- 597 [20] ZHANG C-Z, REN S-Q, CHANG M-X, et al. Resistance mechanisms and fitness of *Salmonella*  
598 *Typhimurium* and *Salmonella Enteritidis* mutants evolved under selection with ciprofloxacin in vitro  
599 [J]. *Scientific reports*. 2017, 7(1): 9113.
- 600 [21] DAWAN J, UDDIN M J, AHN J. Development of de novo resistance in *Salmonella Typhimurium*  
601 treated with antibiotic combinations [J]. *FEMS microbiology letters*. 2019, 366(10): fnz127.
- 602 [22] WAYNE P A. CLINICAL AND LABORATORY STANDARDS INSTITUTE. PERFORMANCE  
603 STANDARDS FOR ANTIMICROBIAL SUSCEPTIBILITY TESTING [J]. 2011.

- 604 [23] GULLBERG E, CAO S, BERG O G, et al. Selection of Resistant Bacteria at Very Low Antibiotic  
605 Concentrations [J]. PLoS Pathogens. 2011, 7(7): 1-9.
- 606 [24] Gu Y , Wang S , Huang L , et al. Development of Resistance in Escherichia coli ATCC25922  
607 under Exposure of Sub-Inhibitory Concentration of Olaquinox[J]. Antibiotics. 2020, 9(11):791.
- 608 [25] SAMUEL H, ALBERT R, PETER D, et al. Serotypes and Antimicrobial Resistance in Salmonella  
609 enterica Recovered from Clinical Samples from Cattle and Swine in Minnesota, 2006 to 2015 [J]. Plos  
610 One. 2016, 11(12): e0168016.
- 611 [26] KIM S Y, LEE S K, PARK M S, et al. Analysis of the Fluoroquinolone Antibiotic Resistance  
612 Mechanism of Salmonella enterica Isolates [J]. Journal of Microbiology and Biotechnology. 2016,  
613 26(9): 1605-1612.
- 614 [27] DIMITROV T, DASHTI A A, ALBAKSAMI O, et al. Ciprofloxacin-resistant Salmonella enterica  
615 serovar typhi from Kuwait with novel mutations in gyrA and parC genes [J]. Journal of clinical  
616 microbiology. 2009, 47(1): 208-11.
- 617 [28] O'REGAN E, QUINN T, PAGÈS J-M, et al. Multiple regulatory pathways associated with  
618 high-level ciprofloxacin and multidrug resistance in Salmonella enterica serovar enteritidis:  
619 involvement of RamA and other global regulators [J]. Antimicrobial agents and chemotherapy. 2009,  
620 53(3): 1080-7.
- 621 [29] QIAN H, CHENG S, LIU G, et al. Discovery of seven novel mutations of gyrB, parC and parE in  
622 Salmonella Typhi and Paratyphi strains from Jiangsu Province of China [J]. Scientific Reports. 2020,  
623 10(1): 7359.
- 624 [30] Baucheron S, Chaslus-Dancla E, Cloeckert A, et al. High-Level Resistance to Fluoroquinolones  
625 Linked to Mutations in gyrA, parC, and parE in Salmonella enterica Serovar Schwarzengrund Isolates  
626 from Humans in Taiwan[J]. Antimicrobial Agents and Chemotherapy. 2005, 49(2):862-863.
- 627 [31] STEPHEN B, THANH D P, THIEU N, et al. Fitness benefits in fluoroquinolone-resistant  
628 Salmonella Typhi in the absence of antimicrobial pressure [J]. eLife. 2013, 2: e01229.
- 629 [32] CHING C, ZAMAN M H. Development and selection of low-level multi-drug resistance over an  
630 extended range of sub-inhibitory ciprofloxacin concentrations in Escherichia coli [J]. Scientific Reports.  
631 2020, 10(1): 8754.
- 632 [33] SONIA, MORGAN-LINNELL, LAUREN, et al. Mechanisms accounting for fluoroquinolone  
633 resistance in Escherichia coli clinical isolates [J]. Antimicrobial Agents and Chemotherapy. 2009, 53(1):  
634 235-241.
- 635 [34] KANG H-W, WOO G-J. Increase of multidrug efflux pump expression in  
636 fluoroquinolone-resistant Salmonella mutants induced by ciprofloxacin selective pressure [J]. Research  
637 in veterinary science, 2014, 97(2): 182-6.
- 638 [35] DU X, LIU Y, SUN X, et al. The mRNA expression of ompF, invA and invE was associated with  
639 the ciprofloxacin-resistance in Salmonella [J]. Archives of Microbiology. 2020, 202, 2263-2268.
- 640 [36] SINGH P R, CECCARELLI M, LOVELLE M, et al. Antibiotic Permeation across the OmpF  
641 Channel: Modulation of the Affinity Site in the Presence of Magnesium [J]. The Journal of Physical  
642 chemistry. 2012, 116(15): 4433-8.
- 643 [37] CAMA J, BAJAJ H, PAGLIARA S, et al. Quantification of Fluoroquinolone Uptake through the  
644 Outer Membrane Channel OmpF of Escherichia coli [J]. Journal of American Chemical Society 2015,  
645 137(43): 13836-43.
- 646 [38] FERREIRA M, SOUSA C F, GAMEIRO P. Fluoroquinolone Metalloantibiotics to Bypass  
647 Antimicrobial Resistance Mechanisms: Decreased Permeation through Porins [J]. Membranes. 2020,

- 648 11(1): 3.
- 649 [39] TSUKASA H , AKIHITO Y , KUNIHICO N . TolC dependency of multidrug efflux systems in  
650 *Salmonella enterica* serovar Typhimurium[J]. *Journal of Antimicrobial Chemotherapy*.  
651 2010(7):1372-1376.
- 652 [40] SINGH R, SWICK M C, LEDESMA K R, et al. Temporal Interplay between Efflux Pumps and  
653 Target Mutations in Development of Antibiotic Resistance in *Escherichia coli* [J]. *Antimicrob Agents*  
654 *Chemother*. 2012, 56(4):1680-1685.
- 655 [41] CHANG T M, LU P L, LI H H, et al. Characterization of Fluoroquinolone Resistance  
656 Mechanisms and Their Correlation with the Degree of Resistance to Clinically Used Fluoroquinolones  
657 among *Escherichia coli* Isolates [J]. *Journal of Chemotherapy*. 2007, 19(5): 488-94.
- 658 [42] ZHANG C Z, CHEN P X, YANG L, et al. Coordinated Expression of *acrAB-tolC* and Eight Other  
659 Functional Efflux Pumps Through Activating *ramA* and *marA* in *Salmonella enterica* serovar  
660 Typhimurium [J]. *Microbial Drug Resistance*. 2017, 24(2): 120-125.
- 661 [43] JESSICA M A B, HELEN E S, VITO R, et al. Expression of homologous RND efflux pump genes  
662 is dependent upon *AcrB* expression: implications for efflux and virulence inhibitor design [J]. *Journal*  
663 *of Antimicrobial Chemotherapy*. 2014, (2): 424-31.
- 664 [44] YAMASAKI S, NIKAIDO E, NAKASHIMA R, et al. The crystal structure of multidrug-resistance  
665 regulator *RamR* with multiple drugs [J]. *Nature Communications*. 2013, 4:2078.
- 666 [45] SWITZER R L , ZALKIN H , SAXILD H H. Purine, Pyrimidine, and Pyridine Nucleotide  
667 Metabolism[M]. John Wiley & Sons, Ltd, 2014.
- 668 [46] BRETON Y L , MISTRY P , VALDES K M , et al. Genome-wide identification of genes required  
669 for fitness of group A *Streptococcus* in human blood.[J]. *Infection & Immunity*, 2013, 81(3):862-875.
- 670 [47] KIM J K , JANG H A , WON Y J , et al. Purine biosynthesis-deficient *Burkholderia* mutants are  
671 incapable of symbiotic accommodation in the stinkbug[J]. *Isme Journal*, 2014, 8(3):552.
- 672 [48] GAO-FEI, YUN-DAN, ZHENG, et al. Novel Mechanistic Insights into Bacterial Fluoroquinolone  
673 Resistance [J]. *Journal of proteome research*. 2019, 18(11): 3955-66.
